# Supplementary material
Source: HighWire-hosted journal article supplement (https://gut.bmj.com/content/71/1/119)
Supplement: inline-supplementary-material-9 [file inline-supplementary-material-9.pdf]

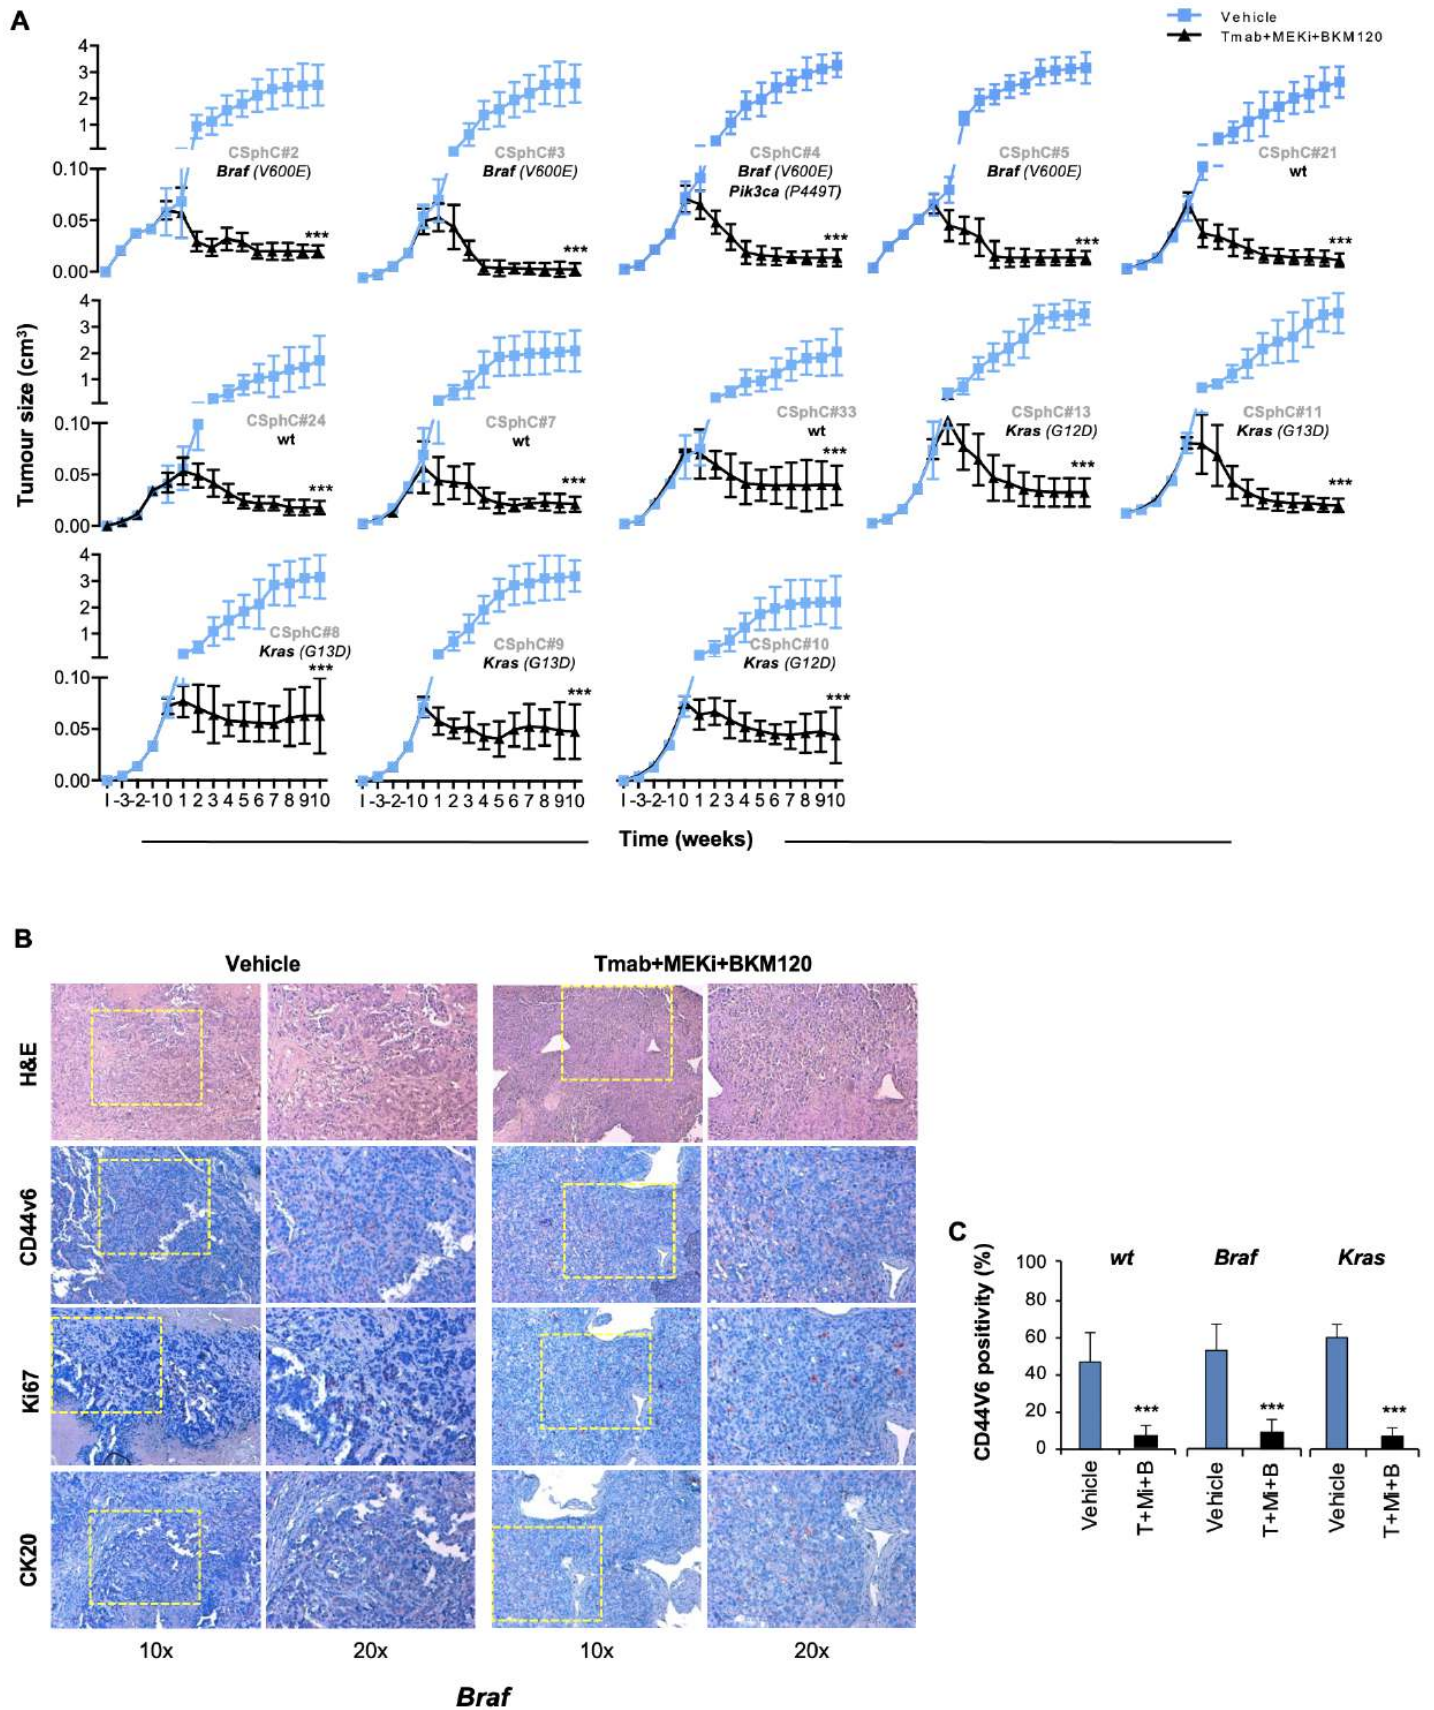

Supplementary Figure 4 Mangiapane et al.

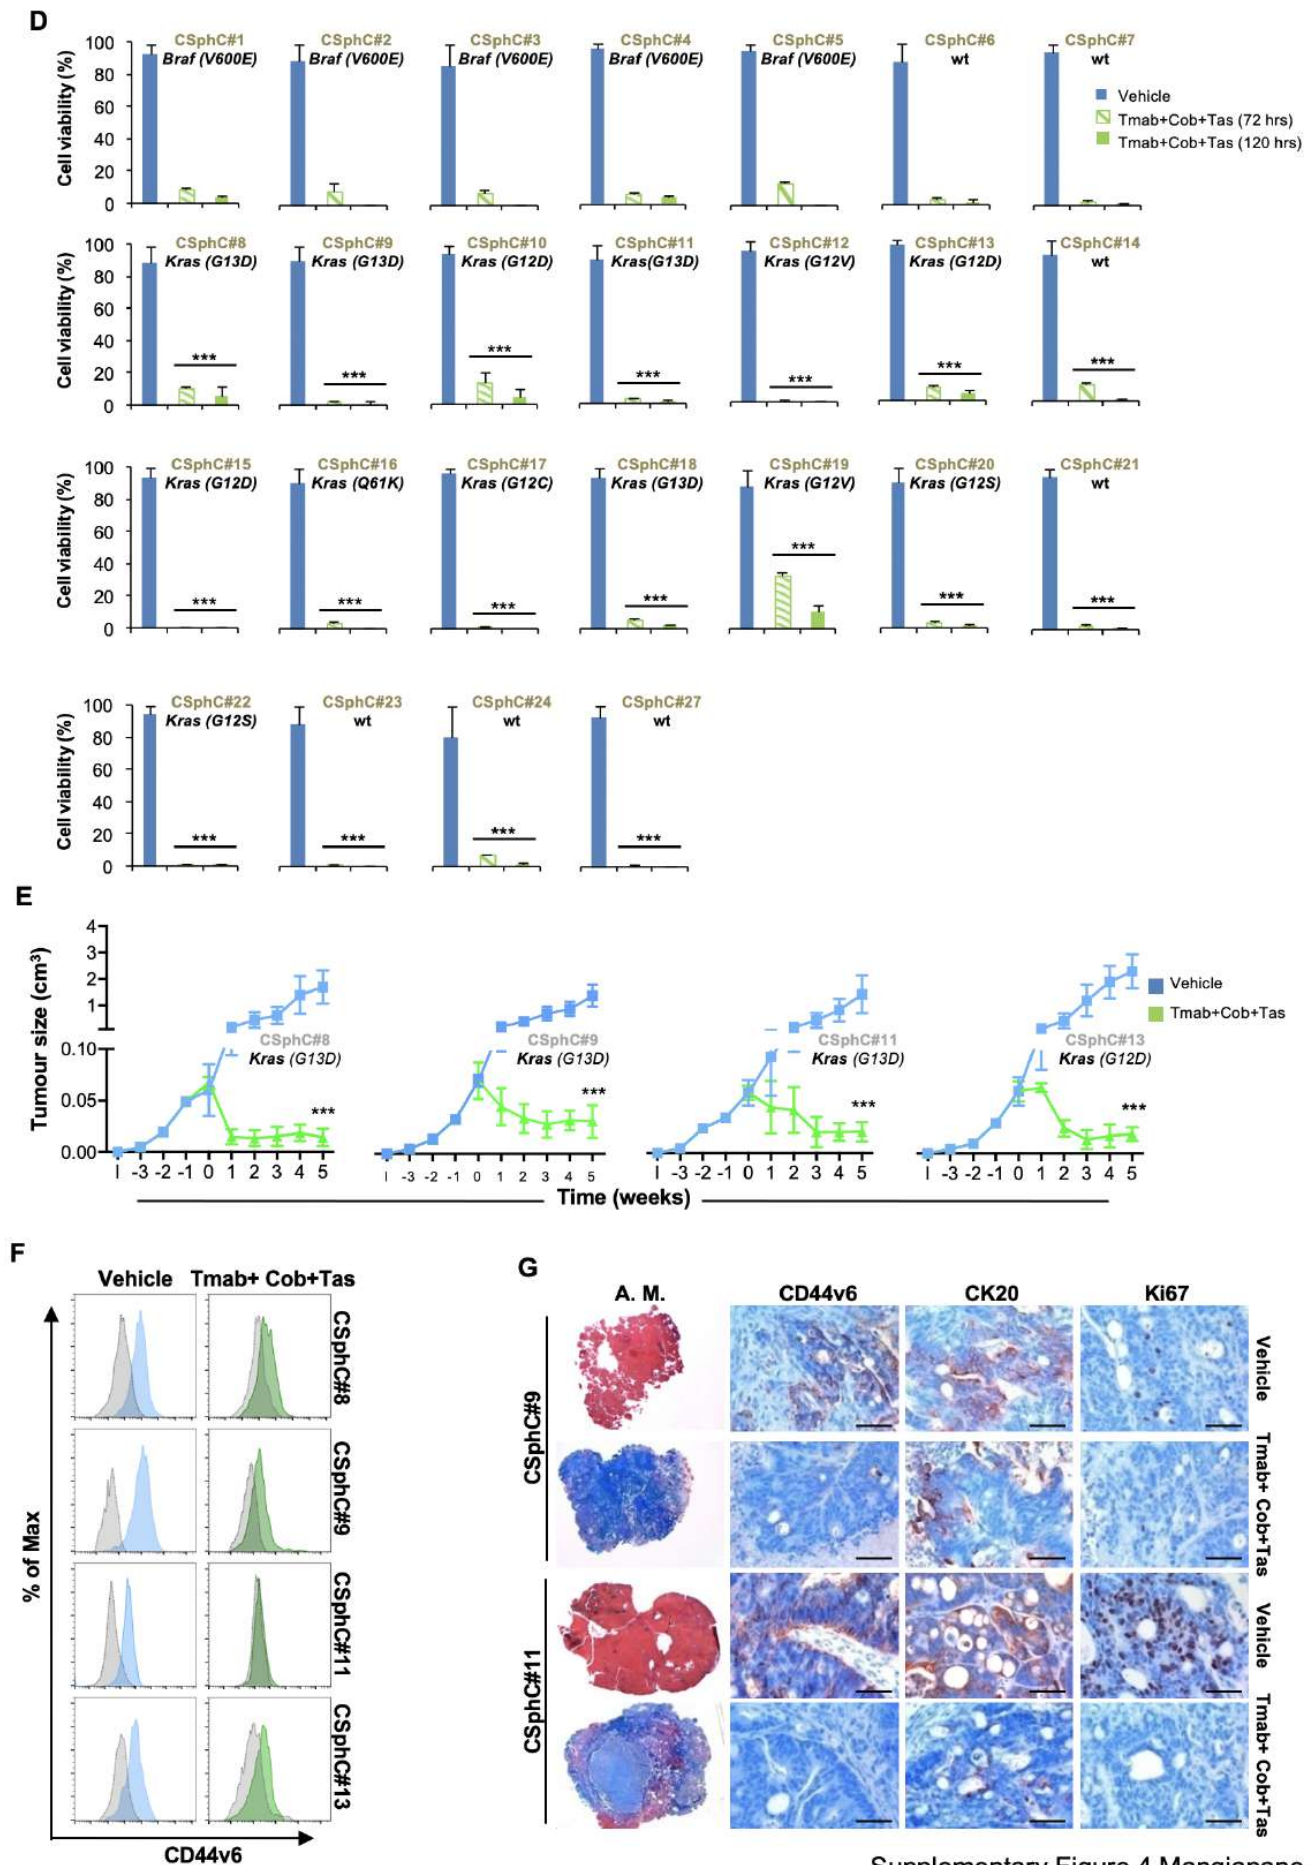

Supplementary Figure 4 Mangiapane et al.
